# Supplementary material
Source: Springer Nature journal article supplement (https://www.springermedizin.de/resource/supplementary/12911_2011_549_MOESM7_ESM.pdf/9526120)

# 1. Freetext Matching Algorithm

Use Freetext Matching Algorithm to extract diagnoses from free text associated with Read terms for death

# 2. Cause of death algorithm

Attempt to identify the single underlying cause of death from Read terms, MCCD information and free text, in this order of priority:

1. MCCD information in structured data area (lowest lettered entry in Part I)
2. Free text stating 'cause of death' or MCCD category (lowest lettered entry in Part I)
3. Read term for a diagnosis on or after date of death
4. Other free text

# 3. Manual review

Manual review of free text and Read coded entries to identify underlying cause of death

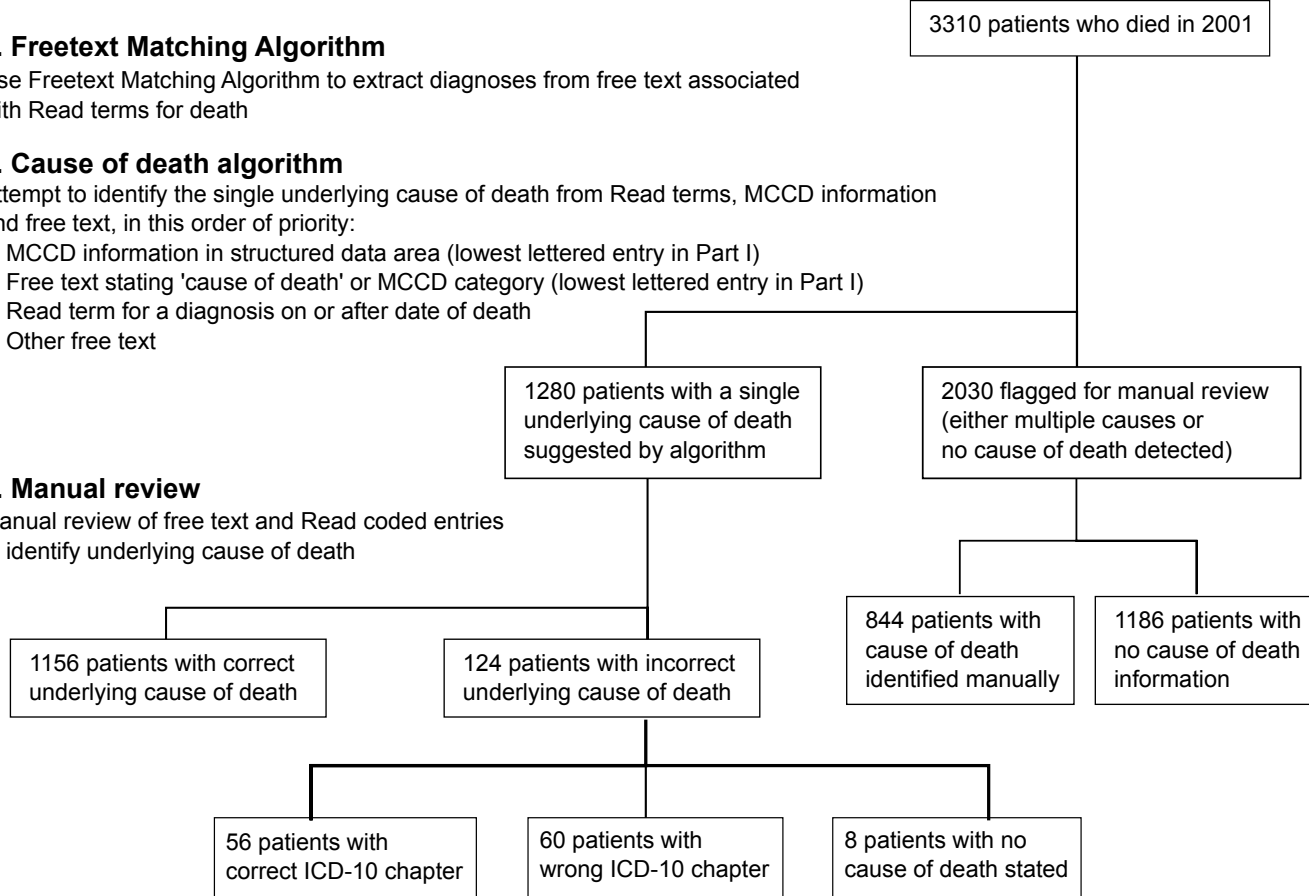

## Source of cause of death information (after manual review) for selected underlying causes

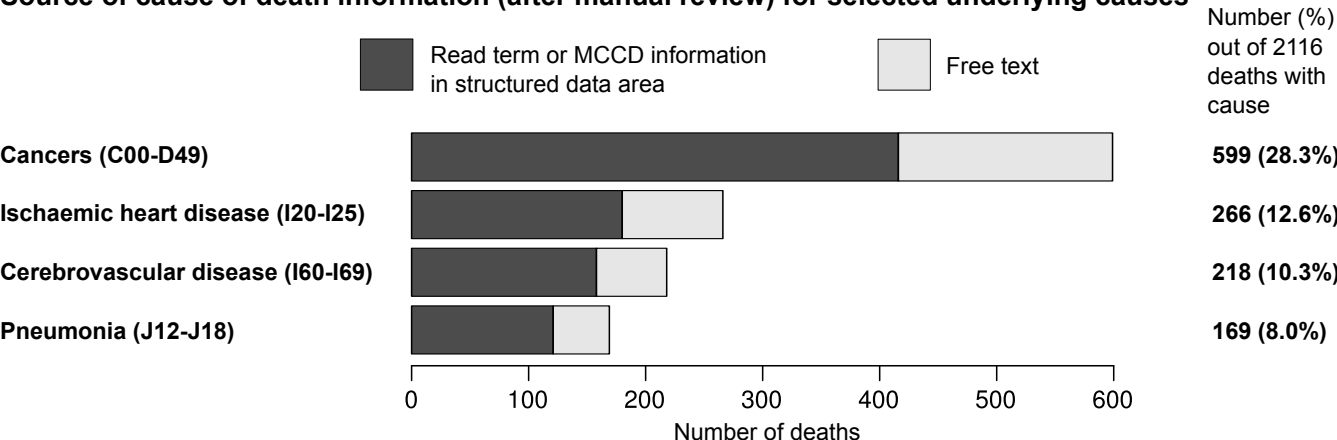

Supplement: MOESM7 [file 9526120]
